# Supplementary material for: A ‘parameiosis’ drives depolyploidization and homologous recombination in Candida albicans
Source: Nat Commun. 2019 Sep 26;10:4388. doi: 10.1038/s41467-019-12376-2 (PMC6763455; doi:10.1038/s41467-019-12376-2)
Supplement: Supplementary file 4 — Source Data [file 41467_2019_12376_MOESM4_ESM.xlsx]

## Sheet: Figure 1
Figure 1B
fraction of cells		Experiment 1	Experiment 2	Experiment 3
	tetraploid	0.720596	0.575353	0.811728
	aneuploid	0.266087	0.42	0.18
	diploid	0.0133166	0.00464718	0.00827229
Figure 1C
		Mitotic	Parasex
	Experiment 1	3.6365e-05	0.0016
	Experiment 2	2.88889e-05	0.0018125
	Experiment 3	0.000121015	0.0016
	Experiment 4	6.25e-05	0.00208956
Figure 1E
		Interval HIS-SAT			Interval SAT-URA
		Mitotic	Parasex		Mitotic	Parasex
	Experiment 1	3.81825e-05	0.11875		1.81825e-05	0.132812
	Experiment 2	2.31e-05	0.109375		1.5e-05	0.119792
	Experiment 3	3.11e-05	0.0511111		1.11e-05	0.0644444
	Experiment 4	3.00094e-05			2.50235e-05

## Sheet: Figure 2
Figure 2B
		WT	Dspo11	Dspo11+SPO11(YF)	Dspo11+SPO11(WT)
	Experiment 1	0.00319167	0.031931	0.0538776	0.00466667
	Experiment 2	0.00176986	0.0186667	0.0142571	0.000102174
	Experiment 3	0.00162759	0.0104776	0.0229302	0.00468182
	Experiment 4	0.00416923	0.014	0.0150857	0.00228074
	Experiment 5	0.00725714	0.0178125	0.06728	0.00525
	Experiment 6	0.00709756	0.0148657	0.0504286	0.0024359
Figure 2D
		WT	Dspo11	Dspo11+SPO11(YF)	Dspo11+SPO11(WT)
	Experiment 1	0.315927	0.0183585		0.198052
	Experiment 2	0.241486	0.001	0.0180361	0.148936
	Experiment 3	0.20339	0.011396	0.001	0.237864
	Experiment 4	0.127306	0.015873	0.00189394	0.111111
	Experiment 5	0.358268	0.0140351	0.00118906	0.281385
	Experiment 6	0.206186	0.0060241	0.0254958	0.189474
Figure 2F
		WT	Drec8	Drec8+REC8(WT)
	Experiment 1	0.00307143	2.7027e-05	0.0151556
	Experiment 2	0.00769231	0.000118889	0.00433871
	Experiment 3	0.0075	0.000195	0.00574603
	Experiment 4	0.0131667	0.000307692	0.0114643
Figure 2G
		WT	Drec8	Drec8+REC8(WT)
	Experiment 1	0.185833	0.0841121	0.14684
	Experiment 2	0.409524	0.00934579	0.124309
	Experiment 3	0.09	0.008	0.333333

## Sheet: Figure 3
Figure 3B			Figure 3C			figure 3D				Figure 3F			figure 3G
	WT_recomb_position			Events/strain			length	type			SPO11_recomb_position			Strain	Recomb events/strain
	391401			8			1729541	recomb			4778372			WT	8
	415087			9			36347	recomb			7555470			WT	9
	449522			7			13339	recomb			9721797			WT	7
	462664			9			12376	recomb			9939971			WT	9
	779531			5			848243	recomb			9830231			WT	5
	803458			7			33707	recomb			9934780			WT	7
	847240			4			53844	recomb			9334885			WT	4
	854069			2			13142	recomb			9367984			WT	2
	868372			8			19678	recomb			13063030			WT	8
	868372			3			691887	recomb			13081550			WT	3
	1067481			14			24036	recomb			13511187			WT	14
	1067481			7			398530	recomb			13543610			WT	7
	1070562			4			785017	recomb			12887134			WT	4
	1070562			5			25977	recomb						WT	5
	1100895			4			10962	recomb						WT	4
	1100911			9			662093	recomb						WT	9
	1100911			4			11182	recomb						WT	4
	1451637			4			53844	recomb						WT	4
	1451637			9			326364	recomb						WT	9
	1486016			13			17338	recomb						WT	13
	1486016			10			24036	recomb						WT	10
	1626857						34379	recomb						SPO11	0
	1634429						350726	recomb						SPO11	2
	1672111						26494	recomb						SPO11	0
	1672111						81247	recomb						SPO11	0
	1709227						9895	recomb						SPO11	1
	1726565						270405	recomb						SPO11	1
	1726565						14133	recomb						SPO11	2
	1726565						56406	recomb						SPO11	0
	1915724						75017	recomb						SPO11	0
	1928100						17622	recomb						SPO11	0
	2052929						351862	recomb						SPO11	0
	2214543						697987	recomb						SPO11	2
	2511582						34379	recomb						SPO11	0
	2585530						672106	recomb						SPO11	4
	2797022						104565	recomb						SPO11	0
	2797022						24133	recomb						SPO11	1
	2797305						27265	recomb						SPO11	0
	2910112						29143	recomb						SPO11	0
	2797305						53844	recomb						SPO11	0
	3338181						823131	recomb						SPO11	0
	3338181						135442	recomb						SPO11	0
	3338698						29143	recomb
	3340639						392385	recomb
	3340639						21951	recomb
	3340639						168110	recomb
	3364675						21951	recomb
	3364675						73319	recomb
	3364675						202190	recomb
	3364675						728531	recomb
	3364675						325202	recomb
	3374346						1125194	recomb
	3374528						655475	recomb
	4056562						23686	recomb
	4076240						587784	BIR
	4212170						499172	BIR
	4223352						693722	BIR
	4429480						1067481	BIR
	4577756						201963	BIR
	4578140						1100911	BIR
	4578140						430598	BIR
	5605085						196641	BIR
	5678404						196641	BIR
	6132948						380095	BIR
	6237513						201867	BIR
	6256520						286259	BIR
	6264583						955406	BIR
	6279563						1389591	BIR
	6309357						910632	BIR
	6309357						396046	BIR
	6309357						59982	BIR
	6325986						369819	BIR
	7322447						854069	BIR
	7322447						869881	BIR
	7344398						894622	BIR
	7344398						417651	BIR
	7719161						303938	BIR
	7719161						1100895	BIR
	7736783						430598	BIR
	7736783						391526	BIR
	7736783						576131	BIR
	7765926						1389591	BIR
	7765926						868372	BIR
	7811800						869881	BIR
	8211697						991708	BIR
	8244715						803458	BIR
	8269267						660478	BIR
	8304369						858980	BIR
	8325673						285820	BIR
	8325673						1100911	BIR
	8439811						1461983	BIR
	8697087						1389207	BIR
	8710426						603018	BIR
	9109252						1240931	BIR
	9109691						847240	BIR
	9127370						578717	BIR
	9438229						894003	BIR
	9954378						1516437	BIR
	10210995						201867	BIR
	10211001						940426	BIR
	10211001
	10216227
	10216227
	10216227
	10216323
	10216323
	10601331
	10602144
	10615464
	10878416
	10884241
	10884241
	10885869
	10889378
	10890063
	10890063
	10890063
	10908982
	10908982
	11417709
	11427985
	11465541
	11478488
	11478488
	11531385
	11541280
	11601222
	11601460
	11601460
	11628487
	11769570
	12211296
	12368783
	12563158
	12657984
	12657984
	12657984
	12657984
	12676878
	12676878
	12676878
	12676878
	12693985
	12701011
	12730722
	12730722
	12730722
	12739231
	13422516
	13481115

## Sheet: Figure 4
Figure 4A								figure 4B								Figure 4C						figure 4D
	30oC diploid								30oC diploid								30oC diploid						30oC diploid
		WT	Dspo11	Dspo11+SPO11(YF)	Dspo11+SPO11(WT)					WT	Dspo11	Dspo11+SPO11(YF)	Dspo11+SPO11(WT)					WT	Drec8	Drec8+REC8(WT)				WT	Drec8	Drec8+REC8(WT)
	Experiment 1	0.00087013	0.000410714	0.000373718	0.000163235				Experiment 1	0.134328	0.0245924	0.00686106	0.0952381				Experiment 1	0.000585	0.000235	0.000315556			Experiment 1	0.0388769	0.0744681	0.0492958
	Experiment 2	0.00273611	0.000211538	0.000270769	0.000136364				Experiment 2	0.0228426	0.0344234	0.0284091	0.0449735				Experiment 2	0.000193243	0.00163043	0.000637209			Experiment 2	0.06639	0.0755556	0.0355839
	Experiment 3	0.000271053	0.000283529	0.000250704	0.0001512				Experiment 3	0.0420712	0.0414938	0.0139585	0.0576271				Experiment 3	0.00087013	0.000411538	0.000193056			Experiment 3	0.0206897	0.0623053	0.107914
	Experiment 4	0.000207914	0.000242574	0.00246	0.00427536				Experiment 4	0.0622837	0.0102828	0.0128544	0.103604				Experiment 4	0.00273611	0.000315556	0.00045			Experiment 4	0.07	0.0140845	0.0197531
									Experiment 5	0.123134	0.00271739	0.001	0.162562										Experiment 5	0.0598291
																							Experiment 6	0.0839161
	37oC diploid								37oC diploid
		WT	Dspo11	Dspo11+SPO11(YF)	Dspo11+SPO11(WT)					WT	Dspo11	Dspo11+SPO11(YF)	Dspo11+SPO11(WT)
	Experiment 1	0.00276	0.000416092	0.000294574	0.00172482				Experiment 1	0.118357	0.0138122	0.001	0.0328947
	Experiment 2	0.000125581	0.000232911	0.000547967	0.000205556				Experiment 2		0.00380435	0.001	0.036036
	Experiment 3	0.000589744	0.000220652		0.000259664				Experiment 3	0.0869565	0.001		0.0744337
	Experiment 4	0.000452857	0.000359333	0.000147674	0.000383486				Experiment 4	0.0599369	0.00448423	0.00275591	0.172727
	Experiment 5	0.000282787	0.000424444	0.00035	0.00020904				Experiment 5	0.113043	0.0052356	0.00712166	0.108108
	30oC tetraploid								30oC tetraploid
		WT	Dspo11	Dspo11+SPO11(YF)	Dspo11+SPO11(WT)					WT	Dspo11	Dspo11+SPO11(YF)	Dspo11+SPO11(WT)
	Experiment 1	0.000338333	0.0009	0.000954839	0.000780769				Experiment 1	0.17734	0.0212766	0.001	0.162562
	Experiment 2	0.000442466	0.00044661	0.000596104	0.000845763				Experiment 2	0.0743034		0.0217865	0.0420842
	Experiment 3	0.000856338	0.00054	0.000779245	0.000534426				Experiment 3		0.0584046	0.0121065	0.111963
	Experiment 4	0.00104231	0.000516393	0.00132821	0.000947917				Experiment 4	0.0664207	0.0444444		0.0714286
	Experiment 5	0.000376786	0.000505	0.000351064	0.000294872				Experiment 5	0.0829384	0.0148515	0.0121212	0.217391
	Experiment 6	0.00018806	0.0001492		0.000305556				Experiment 6	0.174603	0.0321716
	Experiment 7	0.00025
									37oC tetraploid
	37oC tetraploid									WT	Dspo11	Dspo11+SPO11(YF)	Dspo11+SPO11(WT)
		WT	Dspo11	Dspo11+SPO11(YF)	Dspo11+SPO11(WT)				Experiment 1	0.153846	0.0619469	0.00232558	0.0416667
	Experiment 1	0.00185714	0.0125556	0.0243636	0.00135211				Experiment 2	0.25	0.039604	0.0099734	0.0739247
	Experiment 2	0.001	0.01125	0.148276	0.0100541				Experiment 3	0.333333	0.0114286	0.00625	0.216418
	Experiment 3	0.000727273		0.283774	0.0125195				Experiment 4	0.238095	0.01	0.00387597	0.181818
	Experiment 4	0.0006	0.0277778	0.192	0.00802083
	Experiment 5	0.00114545	0.0144928	0.0706849	0.00507692
	Experiment 6				0.000265541
	Experiment 7				0.000347541

## Sheet: Supp_Figure_2
genotype	Relative_fluorescence_units
Diploid	8945
Diploid	9552
Diploid	10231
Diploid	11328
Diploid	9124
Diploid	10774
Diploid	10834
Diploid	10512
Diploid	10219
Diploid	9230
Tetraploid	19034
Tetraploid	20184
Tetraploid	18534
Tetraploid	19042
Tetraploid	19682
Tetraploid	20444
Tetraploid	18023
Tetraploid	19347
Tetraploid	19030
WT	16160
WT	18084
WT	17130
WT	19026
WT	17749
WT	16505
WT	18814
WT	18511
WT	18311
WT	17420
WT	18116
WT	16807
WT	18638
WT	17652
WT	20062
WT	19844
WT	19438
WT	18150
WT	19421
WT	20269
WT	17925
WT	19090
WT	14567
WT	21067
WT	16565
WT	17212
WT	21383
WT	19344
WT	19751
WT	18981
WT	13671
WT	19170
WT	20483
WT	18740
WT	18373
WT	13079
WT	18536
WT	14910
WT	19802
WT	19721
Dspo11	10471
Dspo11	11371
Dspo11	14448
Dspo11	14295
Dspo11	9092
Dspo11	8298
Dspo11	14322
Dspo11	8554
Dspo11	14007
Dspo11	13677
Dspo11	11862
Dspo11	9748
Dspo11	11682
Dspo11	15300
Dspo11	13451
Dspo11	16397
Dspo11	16321
Dspo11	15240
Dspo11	9085
Dspo11	18114
Dspo11	13790
Dspo11	16247
Dspo11	17757
Dspo11	16351
Dspo11	11948
Dspo11	14211
Dspo11	12885
Dspo11	13943
Dspo11	11538
Dspo11	15256
Dspo11	13898
Dspo11	17639
Dspo11	14888
Dspo11	15611
Dspo11	17246
Dspo11	18398
Dspo11+SPO11(YF)	18771
Dspo11+SPO11(YF)	15262
Dspo11+SPO11(YF)	15405
Dspo11+SPO11(YF)	17000
Dspo11+SPO11(YF)	15818
Dspo11+SPO11(YF)	15122
Dspo11+SPO11(YF)	10712
Dspo11+SPO11(YF)	12455
Dspo11+SPO11(YF)	15334
Dspo11+SPO11(YF)	14138
Dspo11+SPO11(YF)	16336
Dspo11+SPO11(YF)	15676
Dspo11+SPO11(YF)	17217
Dspo11+SPO11(YF)	15442
Dspo11+SPO11(YF)	14504
Dspo11+SPO11(YF)	13340
Dspo11+SPO11(YF)	13566
Dspo11+SPO11(YF)	12476
Dspo11+SPO11(YF)	11134
Dspo11+SPO11(YF)	6398
Dspo11+SPO11(YF)	12245
Dspo11+SPO11(YF)	13353
Dspo11+SPO11(YF)	15002
Dspo11+SPO11(YF)	15038
Dspo11+SPO11(YF)	15409
Dspo11+SPO11(YF)	14419
Dspo11+SPO11(YF)	11554
Dspo11+SPO11(YF)	15038
Dspo11+SPO11(YF)	10434
Dspo11+SPO11(YF)	13838
Dspo11+SPO11(YF)	14886
Dspo11+SPO11(YF)	14123
Dspo11+SPO11(YF)	10842
Dspo11+SPO11(YF)	9179
Dspo11+SPO11(YF)	11355
Dspo11+SPO11(YF)	11736
Dspo11+SPO11(WT)	16332
Dspo11+SPO11(WT)	17817
Dspo11+SPO11(WT)	16714
Dspo11+SPO11(WT)	15579
Dspo11+SPO11(WT)	17336
Dspo11+SPO11(WT)	15192
Dspo11+SPO11(WT)	15713
Dspo11+SPO11(WT)	16610
Dspo11+SPO11(WT)	17303
Dspo11+SPO11(WT)	16655
Dspo11+SPO11(WT)	15593
Dspo11+SPO11(WT)	15329
Dspo11+SPO11(WT)	15939
Dspo11+SPO11(WT)	16920
Dspo11+SPO11(WT)	16694
Dspo11+SPO11(WT)	15583
Dspo11+SPO11(WT)	10833
Dspo11+SPO11(WT)	16586
Dspo11+SPO11(WT)	16035
Dspo11+SPO11(WT)	16201
Dspo11+SPO11(WT)	16315
Dspo11+SPO11(WT)	12760
Dspo11+SPO11(WT)	16283
Dspo11+SPO11(WT)	14860
Dspo11+SPO11(WT)	15460
Dspo11+SPO11(WT)	16148
Dspo11+SPO11(WT)	15970
Dspo11+SPO11(WT)	11691
Dspo11+SPO11(WT)	16565
Dspo11+SPO11(WT)	15460
Dspo11+SPO11(WT)	12952
Dspo11+SPO11(WT)	17366
Dspo11+SPO11(WT)	15872
Dspo11+SPO11(WT)	16564
Dspo11+SPO11(WT)	16860
Dspo11+SPO11(WT)	15825
Dspo11+SPO11(WT)	15739
Dspo11+SPO11(WT)	16611
Dspo11+SPO11(WT)	15188
Dspo11+SPO11(WT)	15124

## Sheet: Supp_Figure_3
strain	value
WT	0.584435
WT	0.441491
Dspo11	0.449126
Dspo11	0.529341
Dspo11	0.59161
Dspo11+SPO11(YF)	0.520778
Dspo11+SPO11(YF)	0.493573
Dspo11+SPO11(YF)	0.591947
Dspo11+SPO11(WT)	0.611069
Dspo11+SPO11(WT)	0.456748
Dspo11+SPO11(WT)	0.400252

## Sheet: Supp_Figure_4
genotype	concentration	fraction
WT	zero	0.0142857
WT	zero	0
WT	ten	0.24359
WT	ten	0.322581
WT	twenty-five	0.285714
WT	twenty-five	0.304348
Dspo11	zero	0.114286
Dspo11	zero	0
Dspo11	ten	0.186047
Dspo11	ten	0.18
Dspo11	twenty-five	0.212121
Dspo11	twenty-five	0.461538
Dspo11+SPO11(YF)	zero	0.0882353
Dspo11+SPO11(YF)	zero	0.0172414
Dspo11+SPO11(YF)	ten	0.307692
Dspo11+SPO11(YF)	ten	0.226667
Dspo11+SPO11(YF)	twenty-five	0.333333
Dspo11+SPO11(YF)	twenty-five	0.217391
Dspo11+SPO11(WT)	zero	0.0465116
Dspo11+SPO11(WT)	zero	0
Dspo11+SPO11(WT)	ten	0.166667
Dspo11+SPO11(WT)	ten	0.193548
Dspo11+SPO11(WT)	twenty-five	0.16
Dspo11+SPO11(WT)	twenty-five	0.195122

## Sheet: Supp_Figure_5
Genotype	Fraction Gam-GFP positive
WT	0.468354
WT	0.561404
Dspo11	0.0673077
Dspo11	0.0444444
Dspo11+SPO11(YF)	0.140741
Dspo11+SPO11(YF)	0.169492
Dspo11+SPO11(WT)	0.264706
Dspo11+SPO11(WT)	0.318841

## Sheet: Supp_Figure_8
HIS-NAT			NAT-URA
WT	Dspo11		WT	Dspo11
0.159269	0.0107991		0.182768	0.00971922
0.188854	0.001		0.116099	0.001
0.112994	0.011396		0.107345	0.001
0.101476	0.00793651		0.048893	0.00793651
0.185039	0.0140351		0.173228	0.001
0.0859107	0.001		0.120275	0.0060241

## Sheet: Supp_Figure_10
genotype	Relative_fluorescence_units
Diploid	50
Diploid	45.5
Diploid	52.9
Tetraploid	103
Tetraploid	113.9
Tetraploid	120
Drec8	120
Drec8	104
Drec8	123
Drec8	120
Drec8	117
Drec8	118
Drec8	115
Drec8	117
Drec8	121
Drec8	121
Drec8	119
Drec8	118
Drec8	119
Drec8	113
Drec8	119
Drec8	114
Drec8	109
Drec8	115
Drec8	110
Drec8	109
Drec8	110
Drec8	103
Drec8	111
Drec8	120
Drec8	120
Drec8	113
Drec8	120
Drec8	122
Drec8	119
Drec8	120
WT	86
WT	83.4
WT	96.9
WT	69.6
WT	89.8
WT	81.4
WT	92.1
WT	72.6
WT	99.2
WT	92.9
WT	95.8
WT	54.5
WT	83.1
WT	98.5
WT	66.6
WT	85.7
WT	88.5
WT	92.1
WT	87
WT	76.9
WT	97.5
WT	83.1
WT	98.7
WT	66.6
WT	87.1
WT	94.2
WT	94.7
WT	90.8
Drec8+REC8(WT)	108
Drec8+REC8(WT)	107
Drec8+REC8(WT)	108
Drec8+REC8(WT)	100
Drec8+REC8(WT)	80.7
Drec8+REC8(WT)	103
Drec8+REC8(WT)	109
Drec8+REC8(WT)	46.4
Drec8+REC8(WT)	48.8
Drec8+REC8(WT)	99.6
Drec8+REC8(WT)	90.2
Drec8+REC8(WT)	101
Drec8+REC8(WT)	107
Drec8+REC8(WT)	102
Drec8+REC8(WT)	112
Drec8+REC8(WT)	96.2
Drec8+REC8(WT)	89.6
Drec8+REC8(WT)	59.6
Drec8+REC8(WT)	97
Drec8+REC8(WT)	107
Drec8+REC8(WT)	108
Drec8+REC8(WT)	85
Drec8+REC8(WT)	102
Drec8+REC8(WT)	97.4
Drec8+REC8(WT)	104
Drec8+REC8(WT)	112
Drec8+REC8(WT)	79.4
Drec8+REC8(WT)	85.4
Drec8+REC8(WT)	91
Drec8+REC8(WT)	90.6

[truncated: 3 more sheets: Supp_Figure_12, Supp_figure_13, Supp_Figure_14]
